# Supplementary material for: A Cross-Sectional Study of Myopia and Morning Melatonin Status in Northern Irish Adolescent Children
Source: J Ophthalmol. 2023 Nov 1;2023:7961623. doi: 10.1155/2023/7961623 (PMC10632006; doi:10.1155/2023/7961623)
Supplement: Supplementary Materials — S1 Appendix. The bioanalytical method for salivary melatonin by liquid chromatography-tandem mass spectrometry. S2 STROBE Checklist. Checklist of items that should be included in reports of cross-sectional studies. [file 7961623.f1.zip]

Archive with 2 entries (2 files):
- S1 Appendix.pdf
- S2_STROBE Checklist.pdf
